# Supplementary material for: 1H Nuclear Magnetic Resonance (NMR)-Based Cerebrospinal Fluid and Plasma Metabolomic Analysis in Type 2 Diabetic Patients and Risk Prediction for Diabetic Microangiopathy
Source: PubMed Central journal article supplement (PMC6616639; doi:10.3390/jcm8060874), 2019-06-19
Supplement: jcm-08-00874-s001.pdf [file jcm-08-00874-s001.pdf]

Supplementary Materials:

Table S1. Association of altered metabolites in CSF and plasma samples with the presence of T2DM.

| Comparison                                                  | T2DM vs. control |                 |                                 |                 |
|-------------------------------------------------------------|------------------|-----------------|---------------------------------|-----------------|
|                                                             | Crude OR         | <i>p</i>        | Adjusted OR <sup>a</sup>        | <i>p</i>        |
| <b>Significantly changed metabolites in CSF</b>             |                  |                 |                                 |                 |
| CSF glucose                                                 | 1.062            | <0.001*         | 1.061                           | 0.002*          |
| Alanine                                                     | 1.009            | <0.001*         | 1.009                           | 0.002*          |
| Glycine                                                     | 1.023            | <0.001*         | 1.001                           | 0.001*          |
| Histidine                                                   | 0.906            | <0.001*         | 0.871                           | 0.001*          |
| Mannose                                                     | 1.035            | <0.001*         | 1.040                           | 0.002*          |
| 2-hydroxybutyrate                                           | 1.005            | 0.003*          | 1.004                           | 0.036*          |
| Lactate                                                     | 1.000            | <0.001*         | 1.001                           | 0.001*          |
| Tyrosine                                                    | 1.021            | 0.002*          | 1.029                           | 0.003*          |
| Leucine                                                     | 1.000            | <.0001*         | 1.039                           | 0.004*          |
| Phenylalanine                                               | 1.000            | 0.007*          | 1.033                           | 0.033*          |
| Pyruvate                                                    | 1.000            | 0.006*          | 1.003                           | 0.049*          |
| Valine                                                      | 1.012            | 0.003*          | 1.008                           | 0.037*          |
| Alanine, Glycine, Histidine, Mannose, Pyruvate              | 2.618            | 0.003*          | 4.364                           | 0.005*          |
| <b>Significantly changed metabolites in plasma</b>          | <b>Crude OR</b>  | <b><i>p</i></b> | <b>Adjusted OR <sup>a</sup></b> | <b><i>p</i></b> |
| Plasma glucose                                              | 1.070            | <0.001*         | 1.092                           | 0.003*          |
| Plasma HbA1c                                                | 1.207            | 0.002*          | 1.288                           | 0.019*          |
| Plasma HOMA-IR                                              | 1.732            | 0.002*          | 1.712                           | 0.027*          |
| Alanine                                                     | 0.999            | 0.015*          | 0.998                           | 0.004*          |
| Citrate                                                     | 0.991            | 0.002*          | 0.988                           | 0.003*          |
| Histidine                                                   | 0.977            | 0.002*          | 0.974                           | 0.003*          |
| Lipid (CH <sub>2</sub> -CH=CH)                              | 1.000            | 0.005*          | 1.000                           | 0.043*          |
| N-acetyl glycoprotein                                       | 1.000            | <0.001*         | 1.000                           | 0.003*          |
| Phenylalanine                                               | 1.024            | <0.001*         | 1.024                           | 0.001*          |
| Glutamine                                                   | 1.000            | 0.001*          | 0.997                           | 0.001*          |
| Acetate                                                     | 1.004            | 0.099           | 1.006                           | 0.028*          |
| Leucine                                                     | 1.000            | 0.002*          | 1.004                           | 0.036*          |
| Acetate, Citrate, Histidine, Leucine, N-acetyl-glycoprotein | 2.718            | <.0001*         | 5.355                           | <0.001*         |

Abbreviation: T2DM, type 2 diabetes mellitus; OR, odds ratio; HbA1c, glycated hemoglobin A1c; HOMA-IR, Homeostatic Model Assessment for Insulin Resistance <sup>a</sup>Adjusted for age, sex, body mass index (BMI), and medications for chronic diseases (hypertension, hyperlipidemia) \* *p* < 0.05.

### (A) CSF

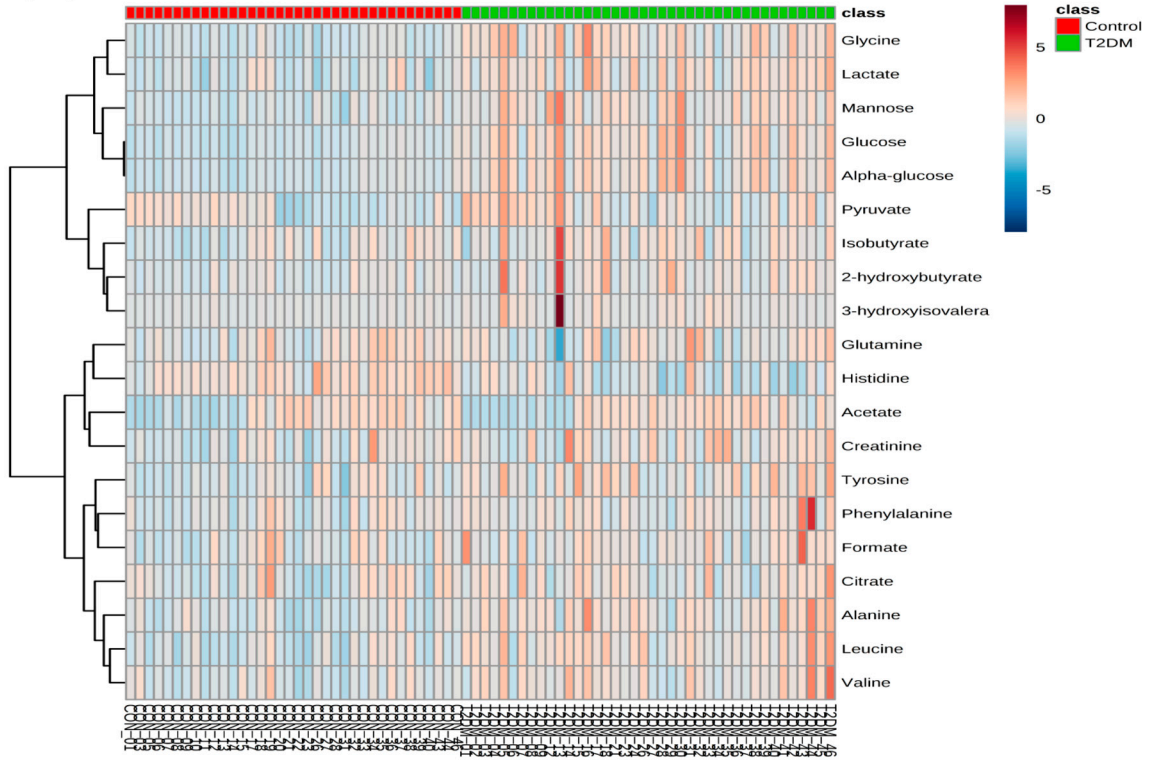

### (B) Plasma

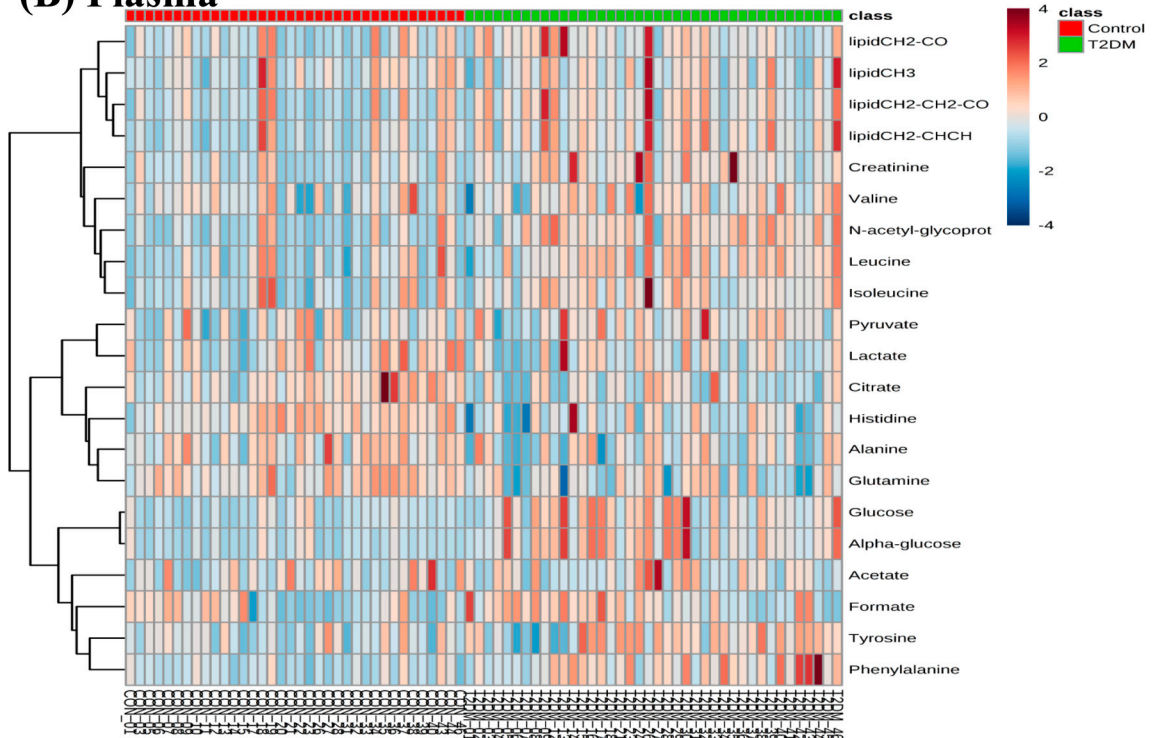

**Figure S1.** Metabolite heatmaps in (A) CSF and (B) plasma samples from T2DM patients and control subjects.

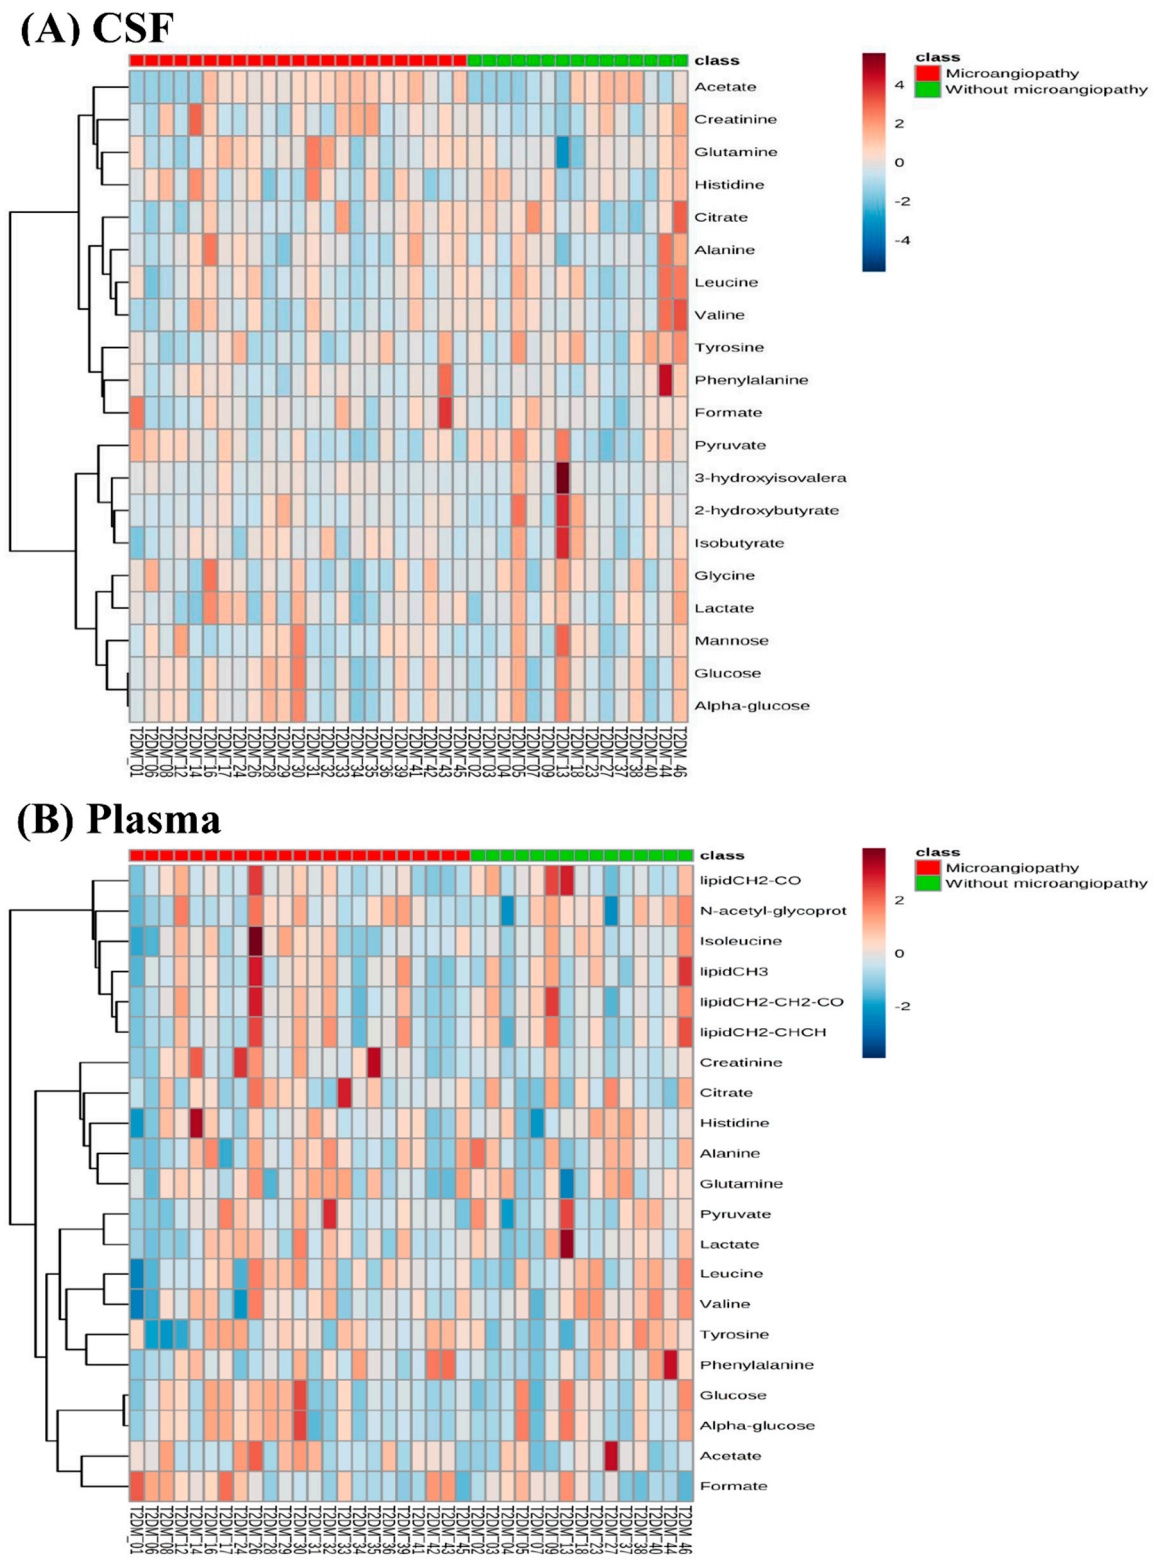

**Figure S2.** Metabolite heatmaps in (A) CSF and (B) plasma samples from T2DM patients with microangiopathy versus T2DM patients without microangiopathy.

**(A) CSF**

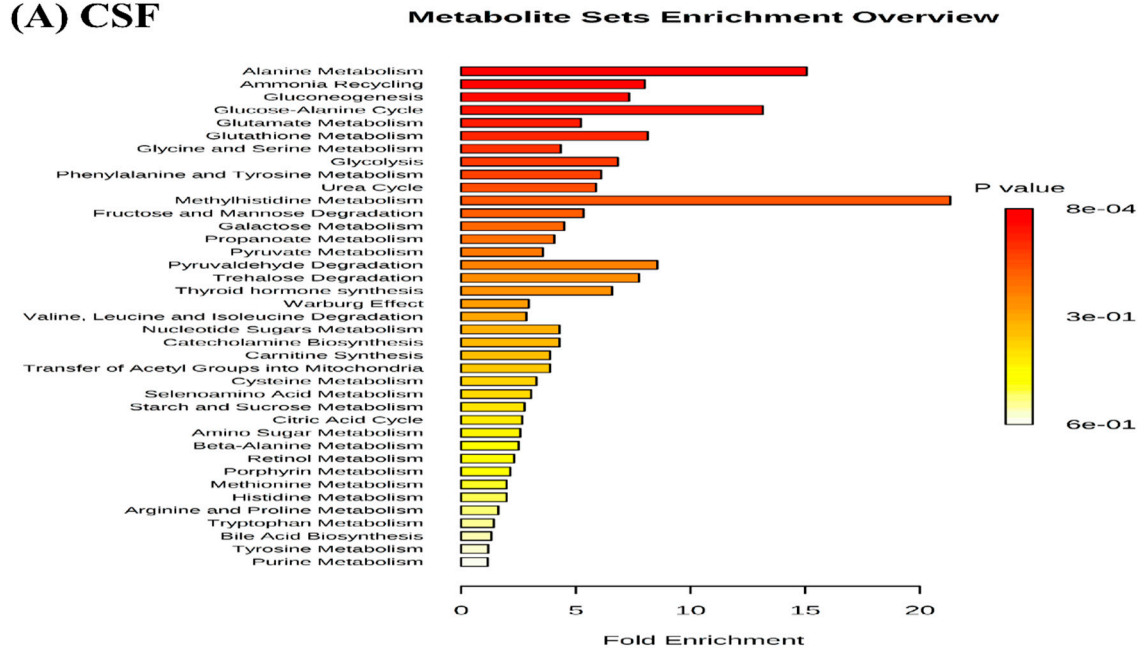

**(B) plasma**

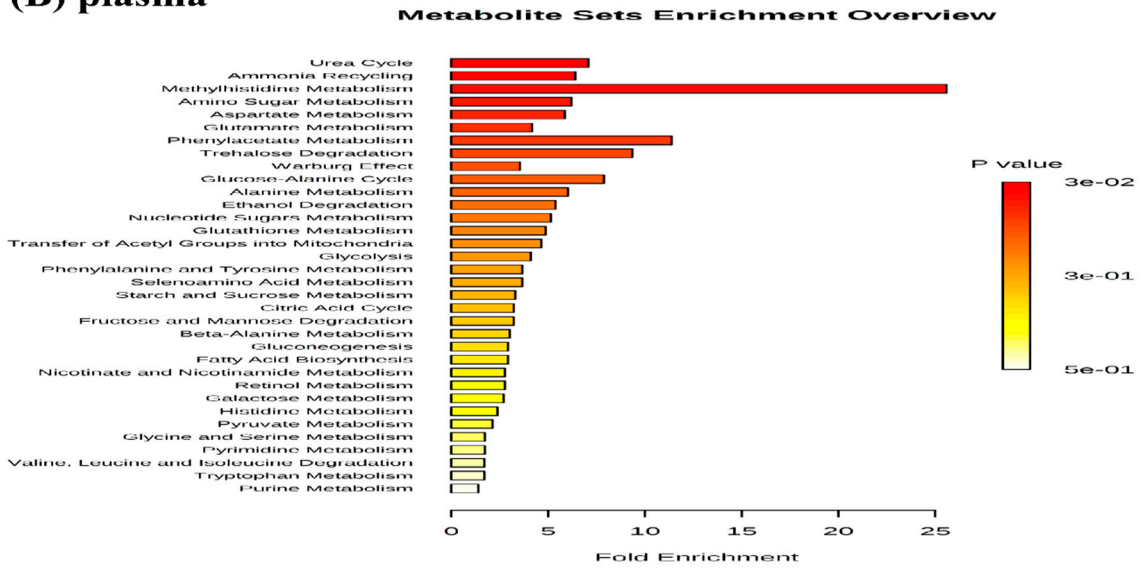

**Figure S3.** Enrichment analysis of involved metabolic pathways for significant metabolites in (A) CSF (B) plasma samples from T2DM patients.
